# Supplementary material for: Novel fast pathogen diagnosis method for severe pneumonia patients in the intensive care unit: randomized clinical trial
Source: eLife. 2022 Oct 7;11:e79014. doi: 10.7554/eLife.79014 (PMC9605691; doi:10.7554/eLife.79014)
Supplement: Appendix 1—figure 2—source data 1. [file elife-79014-app1-fig2-data1.xlsx]

## Sheet: Sheet1
Distribution of pathogens in ICU of Nanjing Drum Tower Hospital in 2017
Code	Species	Strains	Percentage (%)	Patients
aba	Acinetobacter baumannii	178	16	178
kpn	Klebsiella pneumoniae ss. pneumoniae	154	13	154
eco	Escherichia coli	105	9	105
pae	Pseudomonas aeruginosa	103	9	103
sau	Staphylococcus aureus ss. aureus	85	7	85
pma	Stenotrophomonas maltophilia	64	6	64
sep	Staphylococcus epidermidis	63	6	63
efm	Enterococcus faecium	59	5	59
ecl	Enterobacter cloacae	43	4	43
efa	Enterococcus faecalis	30	3	30
pmi	Proteus mirabilis	22	2	22
eae	Enterobacter aerogenes	22	2	22
sca	Staphylococcus capitis ss. capitis	21	2	21
sho	Staphylococcus hominis ss. hominis	21	2	21
shl	Staphylococcus haemolyticus	14	1	14
sma	Serratia marcescens	14	1	14
mmo	Morganella morganii ss. morganii	12	1	12
cfr	Citrobacter freundii	11	1	11
kox	Klebsiella oxytoca	9	1	9
sct	Streptococcus constellatus	8	1	8
axy	Achromobacter xylosoxidans ss. xylosoxidans	7	1	7
eav	Enterococcus avium	6	1	6
cdi	Citrobacter koseri (diversus)	5	<1%	5
ega	Enterococcus gallinarum	4	<1%	4
smt	Streptococcus mitis	4	<1%	4
pce	Burkholderia cepacia	4	<1%	4
swa	Staphylococcus warneri	3	<1%	3
hal	Hafnia alvei	3	<1%	3
aju	Acinetobacter junii	3	<1%	3
sol	Streptococcus oralis	3	<1%	3
ppe	Proteus penneri	3	<1%	3
egg	Enterobacter gergoviae	2	<1%	2
aeh	Aeromonas hydrophila	2	<1%	2
avi	Aerococcus viridans	2	<1%	2
slu	Staphylococcus lugdunensis	2	<1%	2
mic	Micrococcus sp.	2	<1%	2
pre	Proteus rettgeri	2	<1%	2
ssa	Streptococcus salivarius	2	<1%	2
scp	Staphylococcus caprae	2	<1%	2
stc	Staphylococcus cohnii ss. cohnii	2	<1%	2
ppi	Ralstonia pickettii	1	<1%	1
hin	Haemophilus influenzae	1	<1%	1
eag	Pantoea agglomerans	1	<1%	1
bbi	Prevotella bivia	1	<1%	1
gmo	Gemella morbillorum	1	<1%	1
for	Flavimonas oryzihabitans	1	<1%	1
efe	Escherichia fergusonii	1	<1%	1
koz	Klebsiella pneumoniae ss. ozaenae	1	<1%	1
ppu	Pseudomonas putida	1	<1%	1
ssn	Streptococcus sanguinis	1	<1%	1
ral	Ralstonia sp.	1	<1%	1
eca	Enterococcus casseliflavus	1	<1%	1
kpl	Raoultella planticola	1	<1%	1
spf	Shewanella putrefaciens	1	<1%	1
ecg	Enterobacter cancerogenus (taylorae)	1	<1%	1
kkr	Kocuria kristinae	1	<1%	1
