# Supplementary material for: Novel fast pathogen diagnosis method for severe pneumonia patients in the intensive care unit: randomized clinical trial
Source: eLife. 2022 Oct 7;11:e79014. doi: 10.7554/eLife.79014 (PMC9605691; doi:10.7554/eLife.79014)
Supplement: Appendix 1—figure 3—source data 1. [file elife-79014-app1-fig3-data1.xlsx]

## Sheet: Sheet1
			Unpurified DNA
	NC	Purified DNA	I5-1	I5-2	T5-1	T5-2
repeat 1	824	5585	7183	7588	6809	6644
repeat 2	790	5815	7660	7183	6696	6759
repeat 3	801	6063	7359	8093	7424	6493
