# Supplementary material for: Novel fast pathogen diagnosis method for severe pneumonia patients in the intensive care unit: randomized clinical trial
Source: eLife. 2022 Oct 7;11:e79014. doi: 10.7554/eLife.79014 (PMC9605691; doi:10.7554/eLife.79014)
Supplement: Appendix 1—figure 3—source data 2. [file elife-79014-app1-fig3-data2.xlsx]

## Sheet: K. pneumoniae
	NC			K. pneumoniae strain sample of A patient			K. pneumoniae strain sample of B patient
Incubation time	repeat 1	repeat 2	repeat 3	repeat 1	repeat 2	repeat 3	repeat 1	repeat 2	repeat 3
5min	444	435	428	1591	1781	1703	1598	1505	1458
15min	651	648	642	3048	3504	3326	3070	2911	2930
20min	763	751	746	3566	4095	3926	3629	3428	3451
25min	870	868	870	4018	4643	4487	4195	3995	4024
30min	1048	1032	1027	4447	5142	5032	4707	4523	4634
35min	1180	1169	1160	4659	5359	5300	4961	4827	4950
40min	1348	1314	1317	4873	5614	5573	5250	5116	5272
45min	1246	1249	1235	4038	4621	4683	4383	4315	4408
55min	1473	1472	1436	4067	4632	4694	4456	4439	4518
60min	1594	1588	1547	4053	4585	4734	4461	4445	4558

## Sheet: E. faecium 
	NC			E. faecium strain sample of A patient			E. faecium strain sample of B patient
Incubation time	repeat 1	repeat 2	repeat 3	repeat 1	repeat 2	repeat 3	repeat 1	repeat 2	repeat 3
5min	240	239	249	687	560	567	611	617	731
15min	272	276	295	2168	1742	1474	1678	1732	2090
20min	285	297	313	2841	2300	2005	2182	2241	2677
25min	305	320	341	3584	2938	2516	2792	2875	3426
30min	337	353	378	4325	3669	2985	3563	3675	4343
35min	354	375	397	4686	4070	3389	4078	4218	4924
40min	385	404	429	4990	4462	3892	4613	4779	5529
45min	376	395	412	4142	3810	3499	4109	4253	4878
55min	416	435	452	4150	3902	3852	4441	4521	5164
60min	431	455	479	4118	3891	3916	4478	4584	5161
