# Supplementary material for: Novel fast pathogen diagnosis method for severe pneumonia patients in the intensive care unit: randomized clinical trial
Source: eLife. 2022 Oct 7;11:e79014. doi: 10.7554/eLife.79014 (PMC9605691; doi:10.7554/eLife.79014)
Supplement: Appendix 1—figure 3—source data 3. [file elife-79014-app1-fig3-data3.xlsx]

## Sheet: Sheet1
	A. baumannii					E. coli					K. pneumoniae					S. maltophilia					S. epidermidis
	NC	strain sample of A patient	strain sample of B patient			NC	strain sample of A patient	strain sample of B patient			NC	strain sample of A patient	strain sample of B patient			NC	strain sample of A patient	strain sample of B patient			NC	strain sample of A patient	strain sample of B patient
repeat 1	383	4556	4656		repeat 1	500	6075	6078		repeat 1	1048	4447	4707		repeat 1	374	5466	5344		repeat 1	645	4884	5409
repeat 2	375	4576	4652		repeat 2	496	6001	6223		repeat 2	1032	5142	4523		repeat 2	405	5071	5491		repeat 2	630	5567	5492
repeat 3	382	4571	4695		repeat 3	521	6247	6037		repeat 3	1027	5032	4634		repeat 3	372	5369	5989		repeat 3	740	5156	6053
	S. capitis					S. aureus					E. faecalis					E. faecium					P. aeruginosa
	NC	strain sample of A patient	strain sample of B patient			NC	strain sample of A patient	strain sample of B patient			NC	strain sample of A patient	strain sample of B patient			NC	strain sample of A patient	strain sample of B patient			NC	strain sample of A patient	strain sample of B patient
repeat 1	491	6444	5641		repeat 1	702	4438	4499		repeat 1	867	6674	6441		repeat 1	337	4325	3563		repeat 1	611	4867	4852
repeat 2	502	6017	5598		repeat 2	671	4425	4515		repeat 2	863	6502	6309		repeat 2	353	3669	3675		repeat 2	615	3855	4955
repeat 3	487	6349	5597		repeat 3	703	4210	4416		repeat 3	888	6420	6112		repeat 3	378	2985	4343		repeat 3	635	4272	5172
