# Supplementary material for: Novel fast pathogen diagnosis method for severe pneumonia patients in the intensive care unit: randomized clinical trial
Source: eLife. 2022 Oct 7;11:e79014. doi: 10.7554/eLife.79014 (PMC9605691; doi:10.7554/eLife.79014)
Supplement: Figure 3—source data 1. [file elife-79014-fig3-data1.xlsx]

## Sheet: Sheet1
Cas12a-after-PCR detection						Cas12a detection
		Fluorescence value						Fluorescence value
Incubation time	plasmid concentration	repeat 1	repeat 2	repeat 3		Incubation time	plasmid concentration	repeat 1	repeat 2	repeat 3
30min	10^-7	5197	5323	5335		30min	10^-7	2778	3407	2650
30min	10^-8	5179	5225	5645		30min	10^-8	672	635	714
30min	10^-9	4961	5083	5312		30min	10^-9	461	508	505
30min	10^-10	4878	4799	4942		30min	10^-10	439	441	438
30min	10^-11	4577	4554	4542		30min	10^-11	421	463	468
30min	10^-12	4594	4382	4019		30min	10^-12	456	445	451
30min	10^-13	3078	2997	3103		30min	10^-13	502	525	511
30min	10^-14	1839	1744	1784		30min	10^-14	482	515	518
30min	10^-15	760	742	769		30min	10^-15	468	505	513
30min	10^-16	485	487	509		30min	10^-16	470	470	512
30min	10^-17	530	531	533		30min	10^-17	421	477	466
30min	NC	634	565	558		30min	NC	515	467	482
Cas12a-after-PCR detection						Cas12a detection
		Fluorescence value						Fluorescence value
Incubation time	plasmid concentration	repeat 1	repeat 2	repeat 3		Incubation time	plasmid concentration	repeat 1	repeat 2	repeat 3
60min	10^-7	6554	6651	6562		60min	10^-7	4975	6029	4746
60min	10^-8	6367	6387	6358		60min	10^-8	1300	1241	1403
60min	10^-9	6183	6321	6603		60min	10^-9	721	807	808
60min	10^-10	6316	6240	6392		60min	10^-10	647	669	651
60min	10^-11	6233	6222	6216		60min	10^-11	619	677	660
60min	10^-12	6685	6218	5922		60min	10^-12	665	657	673
60min	10^-13	5340	5164	5365		60min	10^-13	754	797	771
60min	10^-14	3516	3327	3393		60min	10^-14	727	767	803
60min	10^-15	1341	1309	1336		60min	10^-15	650	759	775
60min	10^-16	719	715	715		60min	10^-16	666	691	740
60min	10^-17	822	820	811		60min	10^-17	617	699	677
60min	NC	972	868	884		60min	Blank	781	712	739
