# Supplementary material for: Novel fast pathogen diagnosis method for severe pneumonia patients in the intensive care unit: randomized clinical trial
Source: eLife. 2022 Oct 7;11:e79014. doi: 10.7554/eLife.79014 (PMC9605691; doi:10.7554/eLife.79014)
Supplement: Figure 3—source data 2. [file elife-79014-fig3-data2.xlsx]

## Sheet: A. baumannii test panel
		A. baumannii	E. coli	K. pneumoniae	S. aureus	P. aeruginosa	S. epidermidis	S. capitis	E. faecalis	E. faecium	S. maltophilia	NC
Fluorescence value	repeat 1	6804	298	290	573	447	562	522	455	635	348	276
	repeat 2	6403	273	354	589	436	576	593	451	485	330	295
	repeat 3	6003	306	321	564	492	616	565	533	531	350	320

## Sheet: E. coli test panel
		A. baumannii	E. coli	K. pneumoniae	S. aureus	P. aeruginosa	S. epidermidis	S. capitis	E. faecalis	E. faecium	S. maltophilia	NC
Fluorescence value	repeat 1	562	6694	386	653	419	859	677	739	507	305	421
	repeat 2	582	6169	368	712	421	895	764	733	404	305	435
	repeat 3	515	6841	357	699	420	881	814	997	404	293	437

## Sheet: K. pneumoniae test panel
		A. baumannii	E. coli	K. pneumoniae	S. aureus	P. aeruginosa	S. epidermidis	S. capitis	E. faecalis	E. faecium	S. maltophilia	NC
Fluorescence value	repeat 1	285	219	6312	279	243	259	291	329	319	249	323
	repeat 2	256	233	6255	266	260	265	294	327	298	247	333
	repeat 3	229	260	6177	254	238	261	319	354	269	266	344

## Sheet: S. aureus test panel
		A. baumannii	E. coli	K. pneumoniae	S. aureus	P. aeruginosa	S. epidermidis	S. capitis	E. faecalis	E. faecium	S. maltophilia	NC
Fluorescence value	repeat 1	379	322	311	8286	332	342	330	305	351	346	384
	repeat 2	291	328	317	8315	338	324	328	346	293	366	400
	repeat 3	313	329	321	7582	331	332	337	374	282	361	421

## Sheet: P. aeruginosa test panel
		A. baumannii	E. coli	K. pneumoniae	S. aureus	P. aeruginosa	S. epidermidis	S. capitis	E. faecalis	E. faecium	S. maltophilia	NC
Fluorescence value	repeat 1	506	462	407	467	6613	424	437	412	507	392	451
	repeat 2	442	515	416	479	6719	422	437	421	431	394	439
	repeat 3	418	510	413	491	6663	412	459	318	418	411	470

## Sheet: S. epidermidis test panel
		A. baumannii	E. coli	K. pneumoniae	S. aureus	P. aeruginosa	S. epidermidis	S. capitis	E. faecalis	E. faecium	S. maltophilia	NC
Fluorescence value	repeat 1	789	593	604	639	696	5622	618	621	817	768	599
	repeat 2	712	657	587	632	599	5350	652	598	754	747	662
	repeat 3	690	629	613	631	635	5359	665	695	743	766	622

## Sheet: S. capitis test panel
		A. baumannii	E. coli	K. pneumoniae	S. aureus	P. aeruginosa	S. epidermidis	S. capitis	E. faecalis	E. faecium	S. maltophilia	NC
Fluorescence value	repeat 1	774	619	614	1096	553	975	5734	590	643	554	526
	repeat 2	682	613	602	1039	582	1027	5350	641	585	528	575
	repeat 3	633	645	584	1048	551	1056	6062	695	583	509	531

## Sheet: E. faecalis test panel
		A. baumannii	E. coli	K. pneumoniae	S. aureus	P. aeruginosa	S. epidermidis	S. capitis	E. faecalis	E. faecium	S. maltophilia	NC
Fluorescence value	repeat 1	596	567	530	613	578	623	614	5101	728	524	464
	repeat 2	569	588	572	656	564	625	725	5379	653	554	573
	repeat 3	585	615	521	640	642	686	670	6534	670	560	586

## Sheet: E. faecium test panel
		A. baumannii	E. coli	K. pneumoniae	S. aureus	P. aeruginosa	S. epidermidis	S. capitis	E. faecalis	E. faecium	S. maltophilia	NC
Fluorescence value	repeat 1	427	551	365	410	419	389	563	466	6520	368	323
	repeat 2	419	570	369	435	420	405	623	502	6540	388	368
	repeat 3	393	581	396	417	414	389	619	555	6424	392	375

## Sheet: S. maltophilia test panel
		A. baumannii	E. coli	K. pneumoniae	S. aureus	P. aeruginosa	S. epidermidis	S. capitis	E. faecalis	E. faecium	S. maltophilia	NC
Fluorescence value	repeat 1	470	392	359	450	375	364	358	359	623	6084	380
	repeat 2	463	420	406	444	383	390	360	379	585	6135	392
	repeat 3	477	465	354	399	414	399	360	424	622	5954	422
