# Supplementary material for: Novel fast pathogen diagnosis method for severe pneumonia patients in the intensive care unit: randomized clinical trial
Source: eLife journal article supplement (doi:10.7554/elife.79014), 2022-10-06
Supplement: supp [file elife_poa_e79014_Figure_4_source_data_1.xlsx]

## Sheet: Experimental group
Patient ID	Enrollment time	Day line	SSBD	Antibiotic use before SSBD results were available	Antibiotic adjustment based on SSBD results and clinical information	Classification of antibiotic coverage
B01	2019-09-02	d0				Yes
		d1	Test 1	piperacillin-tazobactam	cease antibiotics	Yes
		d2
		d3	Test 2	piperacillin-tazobactam		Yes
		d4		piperacillin-tazobactam
		d5		piperacillin-tazobactam
		d6		piperacillin-tazobactam
		d7		piperacillin-tazobactam
		d8	Test 3	piperacillin-tazobactam		Yes
		d9		piperacillin-tazobactam
		d10		piperacillin-tazobactam
		d11		piperacillin-tazobactam
		d12		piperacillin-tazobactam
		d13		piperacillin-tazobactam
		d14
B11	2019-09-12	d0				No
		d1	Test 1	cefoperazone-sulbactam and Tigecycline		No
		d2		cefoperazone-sulbactam and Tigecycline
		d3		cefoperazone-sulbactam and Tigecycline
		d4		cefoperazone-sulbactam and Tigecycline
		d5	Test 2	cefoperazone-sulbactam and Tigecycline	cefoperazone-sulbactam, Sulbactam and Polymixin B	Yes
		d6		cefoperazone-sulbactam, Sulbactam and Polymixin B
		d7	Test 3	cefoperazone-sulbactam, Sulbactam and Polymixin B		Yes
		d8		cefoperazone-sulbactam, Sulbactam and Polymixin B
		d9		cefoperazone-sulbactam, Sulbactam and Polymixin B	cefoperazone-sulbactam, Sulbactam , Polymixin B and Teicoplanin
		d10		cefoperazone-sulbactam, Sulbactam , Polymixin B and Teicoplanin
		d11		cefoperazone-sulbactam, Sulbactam , Polymixin B and Teicoplanin
		d12		cefoperazone-sulbactam, Sulbactam , Polymixin B and Teicoplanin
		d13		cefoperazone-sulbactam, Sulbactam , Polymixin B and Teicoplanin
		d14		cefoperazone-sulbactam, Sulbactam , Polymixin B and Teicoplanin
B15	2019-10-08	d0				No
		d1	Test 1	imipenem-cilastatin and Linezolid	imipenem-cilastatinstatin and cefoperazone-sulbactam	Yes
		d2		imipenem-cilastatinstatin and cefoperazone-sulbactam
		d3	Test 2	imipenem-cilastatin and cefoperazone-sulbactam		No
		d4		imipenem-cilastatinstatin and cefoperazone-sulbactam	imipenem-cilastatin , cefoperazone-sulbactam and Teicoplanin
		d5		imipenem-cilastatin , cefoperazone-sulbactam and Teicoplanin
		d6		imipenem-cilastatin , cefoperazone-sulbactam and Teicoplanin
		d7	Test 3	imipenem-cilastatin , cefoperazone-sulbactam and Teicoplanin		Yes
		d8		imipenem-cilastatin , cefoperazone-sulbactam and Teicoplanin
		d9		imipenem-cilastatin , cefoperazone-sulbactam and Teicoplanin
		d10		imipenem-cilastatin , cefoperazone-sulbactam and Teicoplanin
		d11		imipenem-cilastatin , cefoperazone-sulbactam and Teicoplanin
		d12		imipenem-cilastatin , cefoperazone-sulbactam and Teicoplanin
		d13		imipenem-cilastatin , cefoperazone-sulbactam and Teicoplanin
		d14		imipenem-cilastatin , cefoperazone-sulbactam and Teicoplanin
B17	2019-10-15	d0				No
		d1	Test 1	Biapenem		No
		d2		Biapenem	Sulbactam and Tigecycline
		d3	Test 2	Sulbactam and Tigecycline		Yes
		d4		Sulbactam and Tigecycline
		d5		Sulbactam and Tigecycline
		d6		Sulbactam and Tigecycline
		d7	Test 3	Sulbactam and Tigecycline	cease antibiotics	Yes
		d8
		d9
		d10
		d11
		d12
		d13
		d14
B19	2019-10-16	d0				No
		d1	Test 1	Biapenem	Biapenem and Sulbactam	No
		d2		Biapenem
		d3	Test 2	Biapenem and Sulbactam		Yes
		d4		Biapenem and Sulbactam
		d5		Biapenem and Sulbactam	Biapenem, Ceftazidime-Avibactam and Linezolid
		d6		Biapenem and Sulbactam
		d7	Test 3	Biapenem, Ceftazidime-Avibactam and Linezolid		Yes
		d8		Biapenem, Ceftazidime-Avibactam and Linezolid
		d9		Biapenem, Ceftazidime-Avibactam and Linezolid
		d10		Biapenem, Ceftazidime-Avibactam and Linezolid
		d11		Biapenem, Ceftazidime-Avibactam and Linezolid
		d12		Biapenem, Ceftazidime-Avibactam and Linezolid
		d13		Biapenem, Ceftazidime-Avibactam and Linezolid
		d14		Biapenem, Ceftazidime-Avibactam and Linezolid
B21	2019-10-22	d0				No
		d1	Test 1	Ceftazidime-Avibactam		No
		d2		Ceftazidime-Avibactam	Ceftazidime-Avibactam, Linezolid and Levofloxacin
		d3	Test 2	Ceftazidime-Avibactam, Linezolid and Levofloxacin		Yes
		d4		Ceftazidime-Avibactam, Linezolid and Levofloxacin
		d5		Ceftazidime-Avibactam, Linezolid and Levofloxacin
		d6		Ceftazidime-Avibactam, Linezolid and Levofloxacin
		d7		Ceftazidime-Avibactam, Linezolid and Levofloxacin
		d8	Test 3	Ceftazidime-Avibactam, Linezolid and Levofloxacin	Linezolid and Levofloxacin	Yes
		d9		Linezolid and Levofloxacin
		d10		Linezolid and Levofloxacin	Levofloxacin
		d11		Levofloxacin
		d12		Levofloxacin
		d13		Levofloxacin
		d14		Levofloxacin
B23	2019-10-28	d0				No
		d1	Test 1	Imipenem-Cilastatin	Imipenem-Cilastatin and Linezolid	No
		d2		Imipenem-Cilastatin and Linezolid
		d3	Test 2	Imipenem-Cilastatin and Linezolid		No
		d4		Imipenem-Cilastatin and Linezolid
		d5		Imipenem-Cilastatin and Linezolid	Piperacillin -Tazobactam and Linezolid
		d6		Piperacillin -Tazobactam and Linezolid
		d7		Piperacillin -Tazobactam and Linezolid
		d8		Piperacillin -Tazobactam and Linezolid
		d9		Piperacillin -Tazobactam and Linezolid
		d10		Piperacillin -Tazobactam and Linezolid
		d11		Piperacillin -Tazobactam and Linezolid
		d12		Piperacillin -Tazobactam and Linezolid	Piperacillin -Tazobactam
		d13		Piperacillin -Tazobactam
		d14		Piperacillin -Tazobactam
B27	2019-11-14	d0				Yes
		d1	Test 1	Piperacillin -Tazobactam and trimethoprim-sulfamethoxazole		Yes
		d2		Piperacillin -Tazobactam and trimethoprim-sulfamethoxazole
		d3		Piperacillin -Tazobactam and trimethoprim-sulfamethoxazole	Imipenem-Cilastatin and trimethoprim-sulfamethoxazole
		d4		Imipenem-Cilastatin and trimethoprim-sulfamethoxazole
		d5	Test 2	Imipenem-Cilastatin and trimethoprim-sulfamethoxazole	Imipenem-Cilastatin , polymyxin B and trimethoprim-sulfamethoxazole	Yes
		d6		Imipenem-Cilastatin , polymyxin B and trimethoprim-sulfamethoxazole
		d7		Imipenem-Cilastatin , polymyxin B and trimethoprim-sulfamethoxazole
		d8		Imipenem-Cilastatin , polymyxin B and trimethoprim-sulfamethoxazole
		d9	discharged
B29	2019-11-15	d0				No
		d1	Test 1	Imipenem-Cilastatin	Tigecycline	Yes
		d2		Tigecycline
		d3		Tigecycline	Tigecycline and Ceftazidime-Avibactam
		d4	Test 2	Tigecycline and Ceftazidime-Avibactam		Yes
		d5	discharged
B31	2019-12-04	d0				No
		d1	Test 1	Imipenem-Cilastatin and Teicoplanin		No
		d2		Imipenem-Cilastatin and Teicoplanin
		d3	Test 2	Imipenem-Cilastatin and Teicoplanin	Polymixin B, Cefoperazone-Sulbactam, Sulbactam,and Teicoplanin	Yes
		d4		Polymixin B, Cefoperazone-Sulbactam, Sulbactam,and Teicoplanin
		d5		Polymixin B, Cefoperazone-Sulbactam, Sulbactam,and Teicoplanin
		d6		Polymixin B, Cefoperazone-Sulbactam, Sulbactam,and Teicoplanin
		d7	Test 3	Polymixin B, Cefoperazone-Sulbactam, Sulbactam,and Teicoplanin		Yes
		d8		Polymixin B, Cefoperazone-Sulbactam, Sulbactam,and Teicoplanin
		d9		Polymixin B, Cefoperazone-Sulbactam, Sulbactam,and Teicoplanin
		d10		Polymixin B, Cefoperazone-Sulbactam, Sulbactam,and Teicoplanin
		d11	Abandon	Ceasing antibiotics
		d12
		d13	Death
B43	2019-12-27	d0				Yes
		d1	Test 1	Meropenem and Linezolid		Yes
		d2		Meropenem and Linezolid
		d3		Meropenem and Linezolid
		d4	Test 2	Meropenem and Linezolid	Meropenem and Tigecycline	Yes
		d5		Meropenem and Tigecycline
		d6		Meropenem and Tigecycline
		d7	Test 3	Meropenem and Tigecycline		Yes
		d8		Meropenem and Tigecycline
		d9		Meropenem and Tigecycline
		d10		Meropenem and Tigecycline
		d11		Meropenem and Tigecycline
		d12		Meropenem and Tigecycline
		d13		Meropenem and Tigecycline
		d14		Meropenem and Tigecycline
B03	2019-09-05	d0				Yes
		d1	Test 1	Biapenem		Yes
		d2		Biapenem
		d3	Test 2	Biapenem		Yes
		d4		Biapenem
		d5		Biapenem
		d6		Biapenem
		d7		Biapenem
B05	2019-09-06	d0				Yes
		d1	Test 1	Biapenem, Tigecycline and Teicoplanin		Yes
		d2		Biapenem, Tigecycline and Teicoplanin
		d3		Biapenem, Tigecycline and Teicoplanin
		d4	Test 2	Biapenem, Tigecycline and Teicoplanin		Yes
		d5		Biapenem, Tigecycline and Teicoplanin
		d6		Biapenem, Tigecycline and Teicoplanin
		d7	Test 3	Biapenem, Tigecycline and Teicoplanin		Yes
		d8		Biapenem, Tigecycline and Teicoplanin
		d9		Biapenem, Tigecycline and Teicoplanin
		d10		Biapenem, Tigecycline and Teicoplanin	meropenem and tigecyclin
		d11		meropenem and tigecyclin
		d12		meropenem and tigecyclin
		d13		meropenem and tigecyclin
		d14		meropenem and tigecyclin
B07	2019-09-09	d0				No
		d1	Test 1	Biapenem		No
		d2		Biapenem
		d3	Test 2	Biapenem	Piperacillin -Tazobactam	Yes
		d4		Piperacillin -Tazobactam
		d5		Piperacillin -Tazobactam
		d6		Piperacillin -Tazobactam
		d7		Piperacillin -Tazobactam
		d8	Test 3	Piperacillin -Tazobactam		Yes
		d9		Piperacillin -Tazobactam
		d10		Piperacillin -Tazobactam
		d11		Piperacillin -Tazobactam
		d12	discharged
B09	2019-09-08	d0				Yes
		d1	Test 1	Biapenem and Vancomycin		Yes
		d2		Biapenem and Vancomycin
		d3		Biapenem and Vancomycin
		d4		Biapenem and Vancomycin
		d5
		d6
		d7
		d8
		d9
		d10
		d11
		d12
		d13
		d14
B13	2019-09-17	d0				Yes
		d1	Test 1	Piperacillin -Tazobactam, trimethoprim-sulfamethoxazole and Teicoplanin		Yes
		d2		Piperacillin -Tazobactam, trimethoprim-sulfamethoxazole and Teicoplanin
		d3	Test 2	Piperacillin -Tazobactam, trimethoprim-sulfamethoxazole and Teicoplanin	Piperacillin -Tazobactam and trimethoprim-sulfamethoxazole	No
		d4		Piperacillin -Tazobactam and trimethoprim-sulfamethoxazole
		d5		Piperacillin -Tazobactam and trimethoprim-sulfamethoxazole
		d6	discharged
B25	2019-11-06	d0				Yes
		d1	Test 1	Imipenem-Cilastatin and Linezolid		Yes
		d2		Imipenem-Cilastatin and Linezolid
		d3	Test 2	Imipenem-Cilastatin and Linezolid		Yes
		d4		Imipenem-Cilastatin and Linezolid
		d5		Imipenem-Cilastatin and Linezolid
		d6		Imipenem-Cilastatin and Linezolid	Piperacillin -Tazobactam
		d7	Test 3	Piperacillin -Tazobactam		Yes
		d8		Piperacillin -Tazobactam	Biapenem
		d9		Biapenem
		d10		Biapenem
		d11		Biapenem
		d12		Biapenem
		d13		Biapenem
		d14		Biapenem
B33	2019-12-05	d0				Yes
		d1	Test 1	Piperacillin -Tazobactam		Yes
		d2		Piperacillin -Tazobactam
		d3		Piperacillin -Tazobactam
		d4		Piperacillin -Tazobactam
		d5	Test 2	Piperacillin -Tazobactam		Yes
		d6		Piperacillin -Tazobactam
		d7	Test 3	Piperacillin -Tazobactam		Yes
		d8		Piperacillin -Tazobactam
B35	2019-12-10	d0				Yes
		d1	Test 1	Moxifloxacin and Piperacillin -Tazobactam		Yes
		d2		Moxifloxacin and Piperacillin -Tazobactam
		d3	Test 2	Moxifloxacin and Piperacillin -Tazobactam		Yes
		d4		Moxifloxacin and Piperacillin -Tazobactam
		d5		Moxifloxacin and Piperacillin -Tazobactam
		d6		Moxifloxacin and Piperacillin -Tazobactam
		d7	Test 3	Moxifloxacin and Piperacillin -Tazobactam		Yes
		d8		Moxifloxacin and Piperacillin -Tazobactam
		d9		Moxifloxacin and Piperacillin -Tazobactam
		d10		Moxifloxacin and Piperacillin -Tazobactam
		d11		Moxifloxacin and Piperacillin -Tazobactam
		d12		Moxifloxacin and Piperacillin -Tazobactam
		d13		Moxifloxacin and Piperacillin -Tazobactam
		d14		Moxifloxacin and Piperacillin -Tazobactam
B37	2019-12-20	d0				Yes
		d1	Test 1	Biapenem , trimethoprim-sulfamethoxazole and Linezolid		Yes
		d2		Biapenem , trimethoprim-sulfamethoxazole and Linezolid
		d3		Biapenem , trimethoprim-sulfamethoxazole and Linezolid	Piperacillin -Tazobactam and trimethoprim-sulfamethoxazole
		d4	Test 2	Biapenem , trimethoprim-sulfamethoxazole and Linezolid		Yes
		d5	discharged
B39	2019-12-26	d0				Yes
		d1	Test 1	Piperacillin -Tazobactam		Yes
		d2		Piperacillin -Tazobactam
		d3		Piperacillin -Tazobactam	Ceftazidime and Moxifloxacin
		d4		Ceftazidime and Moxifloxacin
		d5	Test 2	Ceftazidime and Moxifloxacin		Yes
		d6		Ceftazidime and Moxifloxacin
		d7		Ceftazidime and Moxifloxacin
		d8	Test 3	Ceftazidime and Moxifloxacin		Yes
		d9		Ceftazidime and Moxifloxacin
		d10		Ceftazidime and Moxifloxacin
		d11		Ceftazidime and Moxifloxacin
		d12		Ceftazidime and Moxifloxacin
		d13		Ceftazidime and Moxifloxacin
		d14		Ceftazidime and Moxifloxacin
B41	2019-12-11	d0				Yes
		d1	Test 1	Piperacillin -Tazobactam		Yes
		d2		Piperacillin -Tazobactam
		d3		Piperacillin -Tazobactam
		d4		Piperacillin -Tazobactam	Moxifloxacin and Piperacillin -Tazobactam
		d5	Test 2	Moxifloxacin and Piperacillin -Tazobactam	Moxifloxacin	Yes
		d6		Moxifloxacin
		d7		Moxifloxacin
		d8		Moxifloxacin
		d9		Moxifloxacin
		d10		Moxifloxacin
		d11		Moxifloxacin

## Sheet: Control group
Patient ID	Enrollment time	Day line	CCT	Antibiotic use before CCT results were available	Antibiotic adjustment based on CCT results and clinical information	Classification of antibiotic coverage
C02	2019-08-27	d0		Meropenem and Vancomycin	Meropenem and Vancomycin	Yes
		d1	Test 1	Meropenem and Vancomycin	Meropenem and Vancomycin	Yes
		d2		Meropenem and Vancomycin
		d3		Meropenem and Vancomycin	Meropenem
		d4		Meropenem
		d5	Test 2	Meropenem		No
		d6		Meropenem
		d7	Test 3	Meropenem		No
		d8		Meropenem
		d9		Meropenem
		d10		Meropenem	Sulbactam and Polymixin B
		d11		Sulbactam and Polymixin B
		d12		Sulbactam and Polymixin B
		d13		Sulbactam and Polymixin B
		d14		Sulbactam and Polymixin B
C04	2019-12-10	d0		Biapenem and Vancomycin		Yes
		d1	Test 1	Biapenem and Vancomycin		Yes
		d2		Biapenem and Vancomycin
		d3		Biapenem and Vancomycin
		d4	Test 2	Biapenem and Vancomycin		Yes
		d5		Biapenem and Vancomycin
		d6		Biapenem and Vancomycin
		d7	Test 3	Biapenem and Vancomycin		Yes
		d8		Biapenem and Vancomycin
		d9		Biapenem and Vancomycin
		d10		Biapenem and Vancomycin
		d11		Biapenem and Vancomycin
		d12		Biapenem and Vancomycin
		d13		Biapenem and Vancomycin
		d14		Biapenem and Vancomycin
C06	2019-12-25	d0		piperacillin-tazobactam		No
		d1	Test 1	piperacillin-tazobactam	piperacillin-tazobactam and Linezolid	No
		d2		piperacillin-tazobactam
		d3		piperacillin-tazobactam and Linezolid
		d4		piperacillin-tazobactam and Linezolid	Biapenem and Linezolid
		d5	Test 2	Biapenem and Linezolid		Yes
		d6		Biapenem and Linezolid
		d7		Biapenem and Linezolid
		d8		Biapenem and Linezolid
		d9		Biapenem and Linezolid
		d10		Biapenem and Linezolid
		d11		Biapenem and Linezolid
		d12		Biapenem and Linezolid
		d13		Biapenem and Linezolid
		d14		Biapenem and Linezolid	Biapenem
C08	2020-01-02	d0		Imipenem-Cilastatin		Yes
		d1	Test 1	Imipenem-Cilastatin		Yes
		d2		Imipenem-Cilastatin
		d3		Imipenem-Cilastatin
		d4		Imipenem-Cilastatin
		d5	Test 2	Imipenem-Cilastatin		Yes
		d6		Imipenem-Cilastatin
		d7	Test 3	Imipenem-Cilastatin	cease antibiotics	Yes
C10	2019-12-11	d0		cefoperazone-sulbactam		No
		d1	Test 1	cefoperazone-sulbactam		No
		d2		cefoperazone-sulbactam
		d3	Test 2	cefoperazone-sulbactam		No
		d4		cefoperazone-sulbactam
		d5		cefoperazone-sulbactam
		d6		cefoperazone-sulbactam
		d7		cefoperazone-sulbactam
		d8		cefoperazone-sulbactam
		d9	Test 3	cefoperazone-sulbactam		No
		d10		cefoperazone-sulbactam
		d11		cefoperazone-sulbactam
		d12		cefoperazone-sulbactam
		d13		cefoperazone-sulbactam
		d14		cefoperazone-sulbactam	Tigecycline
C12	2019-10-05	d0		Moxifloxacin		Yes
		d1	Test 1	Moxifloxacin		Yes
		d2		Moxifloxacin
		d3		Moxifloxacin
		d4		Moxifloxacin
		d5	Test 2	Moxifloxacin		Yes
		d6		Moxifloxacin
		d7	Test 3	Moxifloxacin		Yes
		d8		Moxifloxacin
		d9		Moxifloxacin
		d10		Moxifloxacin
		d11		Moxifloxacin
		d12		Moxifloxacin
		d13		Moxifloxacin
		d14		Moxifloxacin	Biapenem
C14	2020-01-10	d0		Biapenem and Linezolid		No
		d1	Test 1	Biapenem and Linezolid		No
		d2		Biapenem and Linezolid
		d3	Test 2	Biapenem and Linezolid		No
		d4		Biapenem and Linezolid
		d5		Biapenem and Linezolid	Polymyxin B and Tigecycline
		d6		Polymyxin B and Tigecycline
		d7		Polymyxin B and Tigecycline
		d8	Test 3	Polymyxin B and Tigecycline		Yes
		d9		death
C16	2019-09-04	d0		cefoperazone-sulbactam		Yes
		d1	Test 1	cefoperazone-sulbactam		Yes
		d2		cefoperazone-sulbactam
		d3	Test 2	cefoperazone-sulbactam		Yes
		d4		cefoperazone-sulbactam
		d5		cefoperazone-sulbactam
		d6		cefoperazone-sulbactam
C18	2019-11-11	d0		Moxifloxacin		No
		d1	Test 1	Moxifloxacin		No
		d2		Moxifloxacin
		d3		Moxifloxacin
		d4	Test 2	Moxifloxacin		No
		d5		Moxifloxacin	Polymyxin B and Tigecycline
		d6		Polymyxin B and Tigecycline
		d7		Polymyxin B and Tigecycline
		d8	Test 3	Polymyxin B and Tigecycline		Yes
		d9		Polymyxin B and Tigecycline
		d10		Polymyxin B and Tigecycline
		d11		Polymyxin B and Tigecycline
		d12		Polymyxin B and Tigecycline
		d13		Polymyxin B and Tigecycline
		d14		Polymyxin B and Tigecycline
C20	2019-12-04	d0		piperacillin-tazobactam		No
		d1	Test 1	piperacillin-tazobactam		No
		d2		piperacillin-tazobactam
		d3		piperacillin-tazobactam
		d4		piperacillin-tazobactam
		d5	Test 2	piperacillin-tazobactam		No
		d6		piperacillin-tazobactam
		d7		piperacillin-tazobactam	Biapenem
		d8	Test 3	Biapenem		No
		d9		Biapenem
		d10		Biapenem
		d11		Biapenem
		d12		Biapenem
		d13		Biapenem	Biapenem and Tigecycline
		d14		Biapenem and Tigecycline
C22	2019-11-16	d0		piperacillin-tazobactam and Vancomycin		Yes
		d1	Test 1	piperacillin-tazobactam and Vancomycin		Yes
		d2		piperacillin-tazobactam and Vancomycin
		d3		piperacillin-tazobactam and Vancomycin
		d4	Test 2	piperacillin-tazobactam and Vancomycin		Yes
		d5		piperacillin-tazobactam and Vancomycin
		d6		piperacillin-tazobactam and Vancomycin
		d7		piperacillin-tazobactam and Vancomycin
		d8		piperacillin-tazobactam and Vancomycin
		d9		piperacillin-tazobactam and Vancomycin
		d10	Test 3	piperacillin-tazobactam and Vancomycin		Yes
		d11		piperacillin-tazobactam and Vancomycin
		d12		piperacillin-tazobactam and Vancomycin
		d13		piperacillin-tazobactam and Vancomycin	piperacillin-tazobactam
		d14		piperacillin-tazobactam
C24	2019-12-16	d0		cefoperazone-sulbactam, Linezolid and trimethoprim-sulfamethoxazole		Yes
		d1	Test 1	cefoperazone-sulbactam, Linezolid and trimethoprim-sulfamethoxazole		Yes
		d2		cefoperazone-sulbactam, Linezolid and trimethoprim-sulfamethoxazole
		d3	Test 2	cefoperazone-sulbactam, Linezolid and trimethoprim-sulfamethoxazole		Yes
		d4		cefoperazone-sulbactam, Linezolid and trimethoprim-sulfamethoxazole	cefoperazone-sulbactam and trimethoprim-sulfamethoxazole
		d5		cefoperazone-sulbactam and trimethoprim-sulfamethoxazole	cefoperazone-sulbactam
		d6		cefoperazone-sulbactam
		d7		cefoperazone-sulbactam
		d8		cefoperazone-sulbactam
		d9		cefoperazone-sulbactam
		d10		discharged
C26	2019-11-24	d0		Moxifloxacin and cefoperazone-sulbactam		No
		d1	Test 1	Moxifloxacin and cefoperazone-sulbactam		No
		d2		Moxifloxacin and cefoperazone-sulbactam
		d3	Test 2	Moxifloxacin and cefoperazone-sulbactam		No
		d4		Moxifloxacin and cefoperazone-sulbactam
		d5		Moxifloxacin and cefoperazone-sulbactam
		d6		Moxifloxacin and cefoperazone-sulbactam	Tigecycline and cefoperazone-sulbactam
		d7		Tigecycline and cefoperazone-sulbactam	Tigercycline, imipenem-cilastatin and Vancomycin
		d8	Test 3	Tigercycline, imipenem-cilastatin and Vancomycin		Yes
		d9		Tigercycline, imipenem-cilastatin and Vancomycin
		d10		Tigercycline, imipenem-cilastatin and Vancomycin
		d11		Tigercycline, imipenem-cilastatin and Vancomycin
		d12		Tigercycline, imipenem-cilastatin and Vancomycin
		d13		Tigercycline, imipenem-cilastatin and Vancomycin
		d14		Tigercycline, imipenem-cilastatin and Vancomycin
C28	2019-12-04	d0		piperacillin-tazobactam		Yes
		d1	Test 1	piperacillin-tazobactam		Yes
		d2		piperacillin-tazobactam
		d3	Test 2	piperacillin-tazobactam		Yes
		d4		piperacillin-tazobactam
		d5		piperacillin-tazobactam
		d6		piperacillin-tazobactam
		d7	Test 3	piperacillin-tazobactam		Yes
		d8		piperacillin-tazobactam
		d9		piperacillin-tazobactam
		d10		piperacillin-tazobactam
		d11		piperacillin-tazobactam
		d12		piperacillin-tazobactam
		d13		piperacillin-tazobactam	cease antibiotics
		d14
C30	2019-09-14	d0		piperacillin-tazobactam		Yes
		d1	Test 1	piperacillin-tazobactam		Yes
		d2		piperacillin-tazobactam
		d3	Test 2	piperacillin-tazobactam		Yes
		d4		piperacillin-tazobactam
		d5		piperacillin-tazobactam
		d6		piperacillin-tazobactam
		d7	Test 3	piperacillin-tazobactam		Yes
		d8		piperacillin-tazobactam
		d9		piperacillin-tazobactam
		d10		piperacillin-tazobactam
		d11		piperacillin-tazobactam
		d12		piperacillin-tazobactam
		d13		piperacillin-tazobactam
		d14		piperacillin-tazobactam
C32	2019-12-24	d0		Moxifloxacin and Piperacillin -Tazobactam		Yes
		d1	Test 1	Moxifloxacin and Piperacillin -Tazobactam		Yes
		d2		Moxifloxacin and Piperacillin -Tazobactam
		d3	Test 2	Moxifloxacin and Piperacillin -Tazobactam	Moxifloxacin, Piperacillin -Tazobactam and Minocycline	No
		d4		Moxifloxacin, Piperacillin -Tazobactam and Minocycline
		d5		Moxifloxacin, Piperacillin -Tazobactam and Minocycline
		d6		Moxifloxacin, Piperacillin -Tazobactam and Minocycline	Moxifloxacin, Tigecycline and Biapenem
		d7	Test 3	Moxifloxacin, Tigecycline and Biapenem		Yes
		d8		Moxifloxacin, Tigecycline and Biapenem
		d9		Moxifloxacin, Tigecycline and Biapenem
		d10		discharged
C34	2020-01-10	d0		Meropenem		Yes
		d1	Test 1	Meropenem		Yes
		d2		Meropenem
		d3		Meropenem
		d4		Meropenem
		d5		Meropenem
		d6		Meropenem
		d7		Meropenem
		d8		discharged
C36	2020-01-08	d0		cefoperazone-sulbactam		No
		d1	Test 1	cefoperazone-sulbactam		No
		d2		cefoperazone-sulbactam
		d3		cefoperazone-sulbactam
		d4		cefoperazone-sulbactam
		d5	Test 2	cefoperazone-sulbactam		No
		d6		cefoperazone-sulbactam
		d7	Test 3	cefoperazone-sulbactam		No
		d8		cefoperazone-sulbactam	cefoperazone-sulbactam and Linezolid
		d9		cefoperazone-sulbactam and Linezolid
		d10		cefoperazone-sulbactam and Linezolid
		d11		cefoperazone-sulbactam and Linezolid
		d12		cefoperazone-sulbactam and Linezolid	imipenem-cilastatin, cefoperazone-sulbactam and Linezolid
		d13		imipenem-cilastatin, cefoperazone-sulbactam and Linezolid
		d14		imipenem-cilastatin, cefoperazone-sulbactam and Linezolid
C38	2020-01-02	d0		piperacillin-tazobactam		No
		d1	Test 1	piperacillin-tazobactam		No
		d2		piperacillin-tazobactam
		d3	Test 2	piperacillin-tazobactam	Tigecycline	Yes
		d4		Tigecycline
		d5		Tigecycline
		d6		Tigecycline
		d7	Test 3	Tigecycline		Yes
		d8		Tigecycline
		d9		Tigecycline
		d10		Tigecycline
		d11		Tigecycline
		d12		Tigecycline
		d13		Tigecycline
		d14		Tigecycline
C40	2020-01-18	d0		imipenem-cilastatin		No
		d1	Test 1	imipenem-cilastatin		No
		d2		imipenem-cilastatin
		d3	Test 2	imipenem-cilastatin		No
		d4		imipenem-cilastatin
		d5		imipenem-cilastatin	Moxifloxacin and Piperacillin -Tazobactam
		d6		Moxifloxacin and Piperacillin -Tazobactam
C42	2020-01-03	d0		cefoperazone-sulbactam		Yes
		d1	Test 1	cefoperazone-sulbactam		Yes
		d2		cefoperazone-sulbactam
		d3		cefoperazone-sulbactam
		d4	Test 2	cefoperazone-sulbactam		Yes
		d5		cefoperazone-sulbactam
		d6		cefoperazone-sulbactam
		d7		cefoperazone-sulbactam
		d8		discharged
C44	2019-12-11	d0		Piperacillin-Tazobactam		No
		d1	Test 1	Piperacillin-Tazobactam		No
		d2		Piperacillin-Tazobactam
		d3		Piperacillin-Tazobactam
		d4	Test 2	Piperacillin-Tazobactam		No
		d5		Piperacillin-Tazobactam
		d6		Piperacillin-Tazobactam	Piperacillin-Tazobactam and Linezoid
		d7		Piperacillin-Tazobactam and Linezoid
		d8		Piperacillin-Tazobactam and Linezoid
		d9		Piperacillin-Tazobactam and Linezoid
		d10		Piperacillin-Tazobactam and Linezoid
		d11		Piperacillin-Tazobactam and Linezoid
		d12		Piperacillin-Tazobactam and Linezoid
		d13		Piperacillin-Tazobactam and Linezoid
		d14		Piperacillin-Tazobactam and Linezoid
C46	2020-01-03	d0		cefoperazone-sulbactam		Yes
		d1	Test 1	cefoperazone-sulbactam		Yes
		d2		cefoperazone-sulbactam
		d3	Test 2	cefoperazone-sulbactam		Yes
		d4		cefoperazone-sulbactam
		d5		cefoperazone-sulbactam
		d6		cefoperazone-sulbactam
		d7		cefoperazone-sulbactam	Biapenem
		d8		Biapenem
		d9		Biapenem
		d10	Test 3	Biapenem		Yes
		d11		Biapenem
		d12		Biapenem
		d13		Biapenem
		d14		discharged
C48	2019-10-12	d0		Piperacillin-Tazobactam and Linezoid		Yes
		d1	Test 1	Piperacillin-Tazobactam and Linezoid		Yes
		d2		Piperacillin-Tazobactam and Linezoid
		d3		Piperacillin-Tazobactam and Linezoid
		d4		Piperacillin-Tazobactam and Linezoid
		d5	Test 2	Piperacillin-Tazobactam and Linezoid		Yes
		d6		Piperacillin-Tazobactam and Linezoid
		d7		Piperacillin-Tazobactam and Linezoid
		d8		Piperacillin-Tazobactam and Linezoid
		d9		Piperacillin-Tazobactam and Linezoid	Piperacillin-Tazobactam
		d10		Piperacillin-Tazobactam
		d11		Piperacillin-Tazobactam
		d12		Piperacillin-Tazobactam
		d13		Piperacillin-Tazobactam
		d14		Piperacillin-Tazobactam
