# Supplementary material for: Novel fast pathogen diagnosis method for severe pneumonia patients in the intensive care unit: randomized clinical trial
Source: eLife journal article supplement (doi:10.7554/elife.79014), 2022-10-06
Supplement: supp [file elife_poa_e79014_Figure_4_source_data_2.xlsx]

## Sheet: APACHE II score
		APACHE II score
	Patient ID	Day1	Day3	Day7	Day10	Day14
Experimental group	B01	10	10	10	10	7
	B11	13	14	16	10	9
	B15	23	22	12	14	12
	B17	15	16	14	14	14
	B19	19	19	22	18	17
	B21	26	25	24	22	24
	B23	8	8	9	8	14
	B27	17	21	21	discharged	discharged
	B29	20	20	discharged	discharged	discharged
	B31	34	24	Missed	Abandon	Abandon
	B43	35	Missed	15	Missed	Missed
	B03	16	7	5	discharged	discharged
	B05	13	15	17	12	16
	B07	8	6	7	5	Missed
	B09	8	8	5	5	2
	B13	26	24	discharged	discharged	discharged
	B25	11	12	12	4	4
	B33	20	16	14	16	Missed
	B35	11	7	7	6	4
	B37	21	23	discharged	discharged	discharged
	B39	10	11	8	9	4
	B41	17	Missed	4	Missed	Missed
Control group	C02	19	20	17	18	20
	C04	9	8	1	2	Missed
	C06	16	15	12	14	18
	C08	15	14	14	14	Missed
	C10	21	21	11	17	16
	C12	18	16	14	18	11
	C14	34	35	39	Death	Death
	C16	14	11	discharged	discharged	discharged
	C18	14	16	9	9	Missed
	C20	22	22	24	24	24
	C22	18	11	10	9	4
	C24	33	27	32	discharged	discharged
	C26	20	24	21	20	25
	C28	18	17	11	14	14
	C30	17	11	12	13	11
	C32	17	16	15	discharged	discharged
	C34	10	Missed	8	discharged	discharged
	C36	12	12	13	12	11
	C38	28	27	18	22	20
	C40	24	25	discharged	discharged	discharged
	C42	12	15	16	discharged	discharged
	C44	11	12	10	10	7
	C46	34	38.3	32	33	Missed
	C48	17	38	10	8	9
