# Supplementary material for: Novel fast pathogen diagnosis method for severe pneumonia patients in the intensive care unit: randomized clinical trial
Source: eLife journal article supplement (doi:10.7554/elife.79014), 2022-10-06
Supplement: supp [file elife_poa_e79014_Figure_4_source_data_3.xlsx]

## Sheet: SOFA score
		SOFA score
	Patient ID	Day1	Day3	Day7	Day10	Day14
Experimental group	B01	3	3	3	3	0
	B11	8	8	10	4	1
	B15	3	4	3	3	4
	B17	5	3	4	3	7
	B19	11	10	9	7	9
	B21	7	8	4	6	7
	B23	5	5	5	4	0
	B27	6	6	6	discharged	discharged
	B29	7	7	discharged	discharged	discharged
	B31	13	11	Missed	discharged	discharged
	B43	10	Missed	6	Missed	Missed
	B03	7	3	3	discharged	discharged
	B05	1	2	7	5	10
	B07	5	5	6	3	Missed
	B09	4	3	0	0	0
	B13	15	12	discharged	discharged	discharged
	B25	5	4	7	1	0
	B33	6	3	3	3	Missed
	B35	4	3	3	3	0
	B37	6	6	discharged	discharged	discharged
	B39	5	6	6	7	0
	B41	3	Missed	0	Missed	Missed
Control group	C02	8	10	4	4	7
	C04	3	3	0	0	Missed
	C06	5	7	5	5	2
	C08	3	3	0	0	Missed
	C10	4	5	3	3	3
	C12	4	4	4	0	3
	C14	6	8	16	Death	Death
	C16	4	3	discharged	discharged	discharged
	C18	3	3	3	0	Missed
	C20	9	9	9	7	9
	C22	3	3	3	3	0
	C24	6	5	8	discharged	discharged
	C26	8	8	8	5	8
	C28	8	6	6	3	4
	C30	6	8	3	3	3
	C32	9	9	12	discharged	discharged
	C34	3	Missed	0	discharged	discharged
	C36	4	4	3	3	3
	C38	8	9	7	6	6
	C40	8	7	discharged	discharged	discharged
	C42	10	8	7	discharged	discharged
	C44	5	5	0	0	0
	C46	10	Missed	7	10	Missed
	C48	6	Missed	0	0	0
