# Supplementary material for: Novel fast pathogen diagnosis method for severe pneumonia patients in the intensive care unit: randomized clinical trial
Source: eLife journal article supplement (doi:10.7554/elife.79014), 2022-10-06
Supplement: supp [file elife_poa_e79014_Source_data_1.xlsx]

## Sheet: Clinical record
Experimental group
Patient ID	Age	Gender	Enrollment time	Day1																									Day3
				APACHE II score	SOFA score	Tmax-d1	SBP	Mechanical ventilation	FiO2	PEEP	P/F	WBC	N (%)	L	Hb	PLT	CRP	PCT	HLA-DR	CD4/CD8	Albumin	Globulin	ALT	AST	Tbil	Dbil	BUN	Cr	APACHE II score	SOFA score	Tmax	SBP	Mechanical ventilation	FiO2	PEEP	P/F	WBC	N (%)	L	Hb	PLT	CRP	PCT	Albumin	Globulin	ALT	AST	Tbil	Dbil
B01	63	F	2019-09-02	10	3	38.2	91	Yes	0.4	8	450	8.5	87.9	0.6	90	109	8	0.321	72.4		34.5	23.2	44.7	41.4	16.5	3.3	11	82	10	3	37.7	91	Yes	0.5	8	482	9.6	88.5	0.6	88	126	10.9	0.094	33.6	21.6	36.8	28.6	13.3	1.2
B11	70	M	2019-09-12	13	8	38.6	90	Yes	0.4	5	458	9	89.2	0.5	68	70	24.2	0.253	64.1		31.2	30.3	30.4	54.9	13.7	10.1	25.4	94	14	8	39.2	91	Yes	0.4	5	385	4.7	80.3	0.5	69	47	100.3	0.98	25.1	20.2	37.5	15.9	26	20.2
B15	70	M	2019-10-08	23	3	38.4	105	Yes	0.8	5	150	14.8	91.8	0.5	114	202	36.6	0.107	68.3		36.2	21	26.4	19.4	5.9	3.7	24.9	152	22	4	37.7	130	No				10	82	0.8	132	182	27.9	0.107	34.7	21.3	88.1	63.1	9	4.2
B17	55	M	2019-10-15	15	5	38.8	142	No				11.3	79.3	1.8	99	372	47.6	1.17	97.2	0.64	36.4	28.3	195.3	67.1	6	1.4	10.7	31	16	3	38.7	149	No				12.1	71.8	2.4	108	416	9.1	0.286	34.3	26.9	162.8	44.2	5.8	1.3
B19	35	M	2019-10-16	19	11	38.3	128	Yes	0.6	5	218	15.8	77.7	1.9	95	127	49.5	0.568	34.1		29.2	21.9	45.7	49.7	316.3	217.2	6.1	47	19	10	38.1	112	Yes	5	0.4	319	18.6	77.3	2.3	89	158	47.4	0.527	30.4	20.4	32	42	281.6	181.3
B21	94	F	2019-10-22	26	7	37.4	152	Yes	0.6	7	200	5.5	86.8	0.5	68	126	237.4	2.2	14.2	1.05	33.8	20.5	24.1	30	16.9	9	32.2	90	25	8	37.6	125	No	0.4	7	341	6.4	88.2	0.3	70	112	229.8	1.51	33.6	23.4	25.4	24.6	7.5	2.3
B23	54	F	2019-10-28	8	5	38	120	Yes	0.5	10	224	15.4	96.6	0.3	91	337	289	0.401		2.18	35.8	23	30.7	8.2	56.7	39.2	14.2	71	8	5	37.9	115	Yes	0.6	8	198	13.9	95	0.5	98	206	129.5	0.264	31.7	23.4	40.9	12.9	35.4	26.2
B27	73	M	2019-11-14	17	6	37.9	105	Yes	0.9	6	86	8.3	93.7	0.3	94	74	58.9	22.44	46.4	5.49	27.8	15.1	87.8	30.8	9.3	3.6	9.9	63	21	6	38.6	110	Yes	1	6	100	10	96	0.2	84	56	107	4.57	27.1	14.3	49.7	25.3	7	2
B29	55	M	2019-11-15	20	7	38.7	110	Yes	0.6	5	120	12.7	88	1	107	241	6.7	0.058			34.6	25.1	21.1	15.6	7.7	1.3	13.4	36	20	7	39.1	102	Yes	0.7	8	110	18.4	95	0.7	116	233	80.5	0.467	31.7	16.4	12.7	10.8	7.3	1
B31	56	M	2019-12-04	34	13	N/A	110	Yes	1	10	187.9	32.8	88	1.7	105	46	104	1.72	29.5	1.64	25.4	22.6	45.7	31.2	4.3	3.9	28	176	24	11	N/A	110	Yes	0.6	8	150	30.7	94.6	0.5	88	92	104.1	1.42	27.2	17.1	21.6	33.9	9.3	4.1
B43	63	M	2019-12-27	35	10	39	99	Yes	1	10	122.7	11.03	90.8	0.2	94	127	109.3	38.79		1.86	28.5	22.3	7	15	3	1.5	16.5	350	Missed	Missed	38	123	Yes	0.4	5	318.5	8.14	76.7	0.47	107	166	192.7	19.24	28.8	21	6	13	4.3	1.7
B03	49	F	2019-09-05	16	7	39	110	Yes	0.4	5	250	7.5	86	0.6	119	93	116	0.061	82.5		33.8	26.3	9.9	11.2	3.9	1.4	3.9	31	7	3	37.5	101	Yes	0.4	5	250	7.3	79.4	0.9	127	91	116.8	0.06	33.8	26.3	9.9	11.2	3.9	1.4
B05	85	F	2019-09-06	13	1	38.1	105	No				8.6	77.1	1.5	94	172	6.5	3.47			43	16.1	59	32	18.4	5.3	15.9	27	15	2	37.7	111	Yes	0.4	5	220	8.5	73.4	1.4	58	35	8.4	5.29	35.7	15.5	43.3	21	16.1	4.2
B07	41	M	2019-09-09	8	5	38.3	97	Yes	0.4	10	314	10.1	85.8	0.9	102	199	24.4	0.052	71		36.4	21.5	70	23.4	14.1	7.3	4.5	21	6	5	38.6	99	Yes	0.5	8		7.1	84.6	0.6	92	195	71.6	0.05	32	21.4	44	20.6	8.6	4.3
B09	18	M	2019-09-08	8	4	39.1	103	Yes	0.6	10	225	8.6	64.5	1.5	102	195	103.8	0.104	22.5		32.7	20.3	91.3	34.6	28.9	17.8	12.7	60	8	3	39	104	Yes	0.6	10	319	10.3	71.4	1.3	85	261	37.8	0.02	29.3	19	60.4	49.4	15.5	8.2
B13	55	M	2019-09-17	26	15	37.5	80	Yes	1	12	100.5	11.5	92.4	0.7	137	84	102.6	4.15	35.6	0.95	25.6	18	32.4	26.9	68.9	42.2	20	67	24	12	38.3	89	Yes	0.7	12	132	13.5	91.8	1	104	56	177.2	4.98	29.3	16.9	27.5	68.8	27.5	19.9
B25	49	F	2019-11-06	11	5	39	118	Yes	0.4	10	300	6.1	81.3	0.6	70	68	143.2	1.27	74.4	2.52	30.3	18.8	227	33.1	17.9	7	5.3	46	12	4	38.5	105	Yes	0.4	10	300	6.1	79.1	0.65	98	158	123.3	0.279
B33	73	F	2019-12-05	20	6	39.4	158	Yes	0.4			11.8	87.9	0.6	110	176	7.7	0.061			30.7	25.3	39.1	35.6	5.2	1.6	8	42	16	3	38.7	130	No	0.41			7.6	80.8	0.82	111	226	5.8	0.069
B35	47	M	2019-12-10	11	4	38.1	120	Yes	0.5	8		10.3	63.4	3.1	128	163	121	4.88	59.8	1.5	39.8	19.3	53.9	48.1	9.1	2.5	10.7	142	7	3	38.1	110	Yes	0.5	8	204	7.2	60	2.2	135	164	20.1	0.293	34.2	24.9	28	23.4	8.3	2.7
B37	78	F	2019-12-20	21	6	37.3	98	Yes	1	10	75.6	8.8	96.7	0.2	96	142	78.5	4.43	86.6		22.5	17.1	37.1	183.8	11.5	6.4	4.7	39	23	6	37.8	120	Yes	1	10	48	14.2	97.9	0.1	87	162	98	1.58	31.4	17.5	25.6	87.8	11.5	6.7
B39	57	M	2019-12-26	10	5	39.2	110	Yes	0.5	5	235	6.7	79.3	1	83	291	4.4	0.161	83	0.51	32.7	18.8	35.1	18.8	15.2	6.1	4.4	14	11	6	38.1	126	Yes	0.4	5	450	9.7	77.5	1.5	85	292	35.6	0.13
B41	39	F	2019-12-11	17	3	38.9	117	Yes	1	12	111	6.97	90.8	0.44	116	132	403	1.2			25	24.8	114	167	5.4	2.3	3.42	42.5	Missed	Missed	37	110	Yes	0.35	12	421	5.88	89	0.33	115	198	144	0.22	31.2	23.1	101	82	4.5	2.2
Control group
Patient ID	Age	Gender	Enrollment time	Day1																									Day3
				APACHE II score	SOFA score	Tmax-d1	SBP	Mechanical ventilation	FiO2	PEEP	P/F	WBC	N (%)	L	Hb	PLT	CRP	PCT	HLA-DR	CD4/CD8	Albumin	Globulin	ALT	AST	Tbil	Dbil	BUN	Cr	APACHE II score	SOFA score	Tmax	SBP	Mechanical ventilation	FiO2	PEEP	P/F	WBC	N (%)	L	Hb	PLT	CRP	PCT	Albumin	Globulin	ALT	AST	Tbil	Dbil
C02	61	F	2019-08-27	19	8	38.7	111	Yes	0.4	5	250	12.7	89.4	0.7	109	139	98.5	1.21	40.1		34.4	23.7	76.8	30.5	7.2	2.2	11.5	50	20	10	38.1	92	Yes	0.4	5	400	34.7	92.1	1.1	93	148	28.7	0.44	34	24.8	69	59	5.4	1.3
C04	45	M	2019-12-10	9	3	38.9	130	Yes	0.6	10	130	10	88.5	0.7	83	199	135.9	0.185	37		33.4	18.6	53.4	69.6	7.9	2.9	12.4	73	8	3	38.4	111	Yes	0.4	8	175	7.6	89.1	0.4	88	241	111	0.099	33.4	18.6	53.4	69.6	7.9	2.9
C06	75	M	2019-12-25	16	5	38.7	118	Yes	0.4	5	190	10.4	84.9	0.6	147	94	65	1.16	30.9		29.2	14.7	2055	756.9	12.9	3.2	19.6	65	15	7	38.7	116	Yes	0.4	5	200	7.1	80.7				64.4	0.48
C08	74	M	2020-01-02	15	3	38.9	122	Yes	0.4	5	350	14.6	89.4	0.8	149	265	164.6	0.084	72.6		32.5	33.9	20.2	23.4	20	11	16.7	56	14	3	37.7	107	Yes	0.4	5		15.2	88.5				135.2	0.09
C10	84	M	2019-12-11	21	4	38.3	114	Yes	0.4	5	200	9.5	92.7	0.4	154	131	40.7	0.02	61.1	0.53	36.5	21.1	26	19.4	13	5.8	12	135	21	5	38.1	106	Yes	0.4	5	175	10.5	80.8	1	142	111	11.7	0.02	38.1	18.4	25.1	26.1	5.5	2.6
C12	80	M	2019-10-05	18	4	37.5	110	Yes	0.5	5	380	8.1	84.1	0.5	131	176	78.7	0.266	69.6	1.7	32	20.5	15.4	8.6	20.8	9	9.4	73	16	4	38.3	110	Yes	0.4	5	284	3.8	81.5	0.4	111	153	106.4	0.111	29.3	17.1	30.5	7.5	26.7	12
C14	76	M	2020-01-10	34	6	37.9	137	Yes	0.6	8	100	15.3	93.6	0.6	67	184	332	12.91	14.3	9	25.5	31.8	91.8	30.3	4.9	4	27.6	295	35	8	38.9	110	Yes	0.6	8	135	17.6	94.7	0.6	67	186	182.8		25.1	28.7	28.9	65.7	6.5	3.5
C16	67	F	2019-09-04	14	4	38.2	108	Yes	0.8	6	80	9.9	93.5	0.2	87	284	128.5	0.418	28		32.2	27.3	40.6	46.1	7.2	2.7	8.9	24	11	3	38.2	120	Yes	0.5	6	210	7.1	86.7	0.5	78	298	98.3	0.388
C18	77	M	2019-11-11	14	3	39	125	Yes	0.4	5	250	11.1	87.8	0.9	96	201	227.5	1.44	5.7		23.5	34	14.6	8.2	7	3.8	5.6	37	16	3	39.7	142	Yes	0.5	3	160	14.8	92	0.8	99	190	181.7	0.491	29	35.3	31	51.2	12	7.9
C20	56	F	2019-12-04	22	9	37.4	150	Yes	0.6	8	135	11.8	83.8	1	69	311	111.7	1.11	49.2		25	18.5	28.8	45.5	3	1.7	27.3	327	22	9	38	135	Yes	0.6	8	250	17.5	90.7	0.6	89	402	110.7	3.9	29	18.8	23.1	22.9	3.6	2.3
C22	64	F	2019-11-16	18	3	39.2	165	Yes	0.6	5	200	15.5	85.4	1.2	104	248	22.4	0.065	14.4		33.1	25.3	141.2	86.7	7.3	3.4	12.4	77	11	3	38.6	135	Yes	0.5	5	270	19.3	90.6	1.1	113	277	4.4	0.063	31.9	22.8	196.2	45.2	10.1	3.6
C24	76	F	2019-12-16	33	6	37.1	118	Yes	0.6	5	145	9.7	91.1	0.3	74	156	31.3	0.02	16.6	1.73	28.9	15.3	4.6	8	2.5	0.7	16.8	259	27	5	36.8	110	Yes	0.4	5	220	12.2	85.5	0.8	73	140	25	1.04	27.7	16.9	2.7	13.7	4.5	0.5
C26	75	M	2019-11-24	20	8	37.2	103	Yes	0.6	12	135	13.2	91.3	0.9	99	163	267.6	100	38.3		29.2	26.9	12.4	27	5.5	2.6	13.5	211	24	8	38.2	130	Yes	0.6	12	100	18	91.1	1	100	173	255.8	100	27.7	26.9	11.2	24.2	3.6	2.2
C28	58	F	2019-12-04	18	8	38.9	129	Yes	0.4	5	350	11.2	87.2	0.9	105	86	73.8	0.087	16.1	0.087	37.1	26.4	59.8	28.8	17.2	7.3	5.4	35	17	6	38.9	133	Yes	0.4	5	500	9.4	81.8	0.9	115	149	74.4	0.06	34.8	26.2	48.5	19.3	16.7	5.3
C30	76	F	2019-09-14	17	6	37.9	95	Yes	0.5	8	234	10.3	77.2	0.6	92	118	100.2	0.092	63.5		29.3	17.2	31	24.2	16.1	7.9	5.4	32	11	8	38	130	Yes	0.5	8	414	6.8	71.9	0.8	94	149	61	0.114	28.9	20.8	69.2	92.7	14.1	8.1
C32	69	M	2019-12-24	17	9	38.6	98	Yes	0.6	8	135	2.1	90.9	0.2	107	99	0.3	30.07	23.1	2.61	29.5	20.7	42.3	119	10.9	7.8	14.2	113	16	9	38.6	97	Yes	0.6	8	150	7.9	96.7	0.1	125	89	221.5	11.03	27.3	25.6	26.2	38.8	14.4	11.7
C34	50	F	2020-01-10	10	3	38.5	112	Yes	0.4	5	386.5	6.11	88.2	0.54	74	142	4.88	0.02		1.65	36.4	17.4	23	28	11.8	5	5.8	33	Missed	Missed	36.9	101	Yes	0.35	5	363	2.65	78.8	0.44	86	140	4.88	0.063	29.7	16	17	20	12.2	4.7
C36	72	M	2020-01-08	12	4	38.6	100	Yes	0.6	8	100	7.9	82.8	0.6	125	138	3.6	0.056	63		32.1	14.2	13.7	17.1	5.9	5.6	8.5	87	12	4	37.8	120	Yes	0.6	8		7.4	82.5	0.7	105	137	10.4	0.061	28.9	10.8	10.7	11.7	9.3	3.4
C38	71	F	2020-01-02	28	8	38.2	127	Yes	0.4	5	400	13.7	72.8	1.4	72	114	149.1	0.356	38.7		29.6	24	6.4	23.2	7.2	3.4	28.8	156.5	27	9	38.3	120	Yes	0.4	3	275	9.6	62.3	0.9	66	98	89.2	0.455	27.4	18.4	6	21	4.7	2.2
C40	64	F	2020-01-18	24	8	39.6	135	Yes	0.9	8	100	24	91.6	1	91	120	41.5	4.98	25.5	2.23	34.7	23.7	8.4	21.7	11.4	5.6	11.9	43	25	7	38.6	119	Yes	0.8	10	120	34.9	94.9	0.6	80	175	83.5	2.38	30.6	24.7	16.5	4.8	8.1	4.2
C42	63	M	2020-01-03	12	10	37.6	134	Yes	0.4	10	325	7.3	83.9	0.6	83	50	57.2	1			34.3	24.1	6.9	11.7	5.9	3	14.1	422	15	8	37.8	107	Yes	0.4	6	375	7.2	79	0.8	85	58	63	0.768	37.2	24	5.4	14.8	6.7	2.9
C44	63	M	2019-12-11	11	5	37.3	99	Yes	0.4	5	425	13.5	82.8	0.9	89	433	97.7	0.123			29.9	27.4	27.3	47.3	12.2	5	10.7	85	12	5	38.5	92	Yes	0.4	5	425	11	77.6	0.9	75	521	119.3	0.104
C46	69	M	2020-01-03	34	10	38.2	134	Yes	0.4	5	500	24	90	1	79	178	127.8	0.864			28.2	17.2	33.2	46.8	3.7	2.7	24.7	347	38.3	Missed	38.3	136	Yes	0.4	5	500	15.1	83.5	0.8	75	223	106.7	0.746	29.6	19.5	25.1	29	4.7	3.4
C48	67	F	2019-10-12	17	6	38	144	Yes	0.5	5	168	31.7	86	1.4	91	314	161.5	0.382	58.6		27.5	30.4	18.4	21.2	11.8	7.3	7.9	37	38	Missed	38	116	Yes	0.6	5	150	9.1	83.9	0.7	77	298	115.1	0.286	27.9	24.6	11.1	12.6	13.1	9
Abbreviations: SBP, systolic blood pressure; PEEP, positive end expiratory pressure; WBC, white blood cell; N (%), percentage of neutrophils; L, Lymphocyte count; Hb, hemoglobin; PLT, platelet; CRP, C-reactive protein; PCT, procalcitonin; HLA-DR, human leukocyte-associated antigen; ALT, alanine transaminase; AST, aspartate transaminase; Tbil, total Bilirubin; Dbil, Direct Bilirubin; BUN, blood ur…
[truncated: 54 more columns]
